# Supplementary material
Source: Springer Nature journal article supplement (https://www.springermedizin.de/resource/supplementary/12889_2009_2231_MOESM1_ESM.pdf/9485080)

### Back ground variables

- Age
- Sex
- Education
- Ethnicity
- Occupation
- Religion
- Income

### Intermediate variables

Processes of change

Duration of cigarette smoking

Level of nicotine dependence

Use of drug other than cigarette

Process of change

Decisional balance

Self efficacy

### Outcome variables

Intention to quit smoking/  
Stages of change

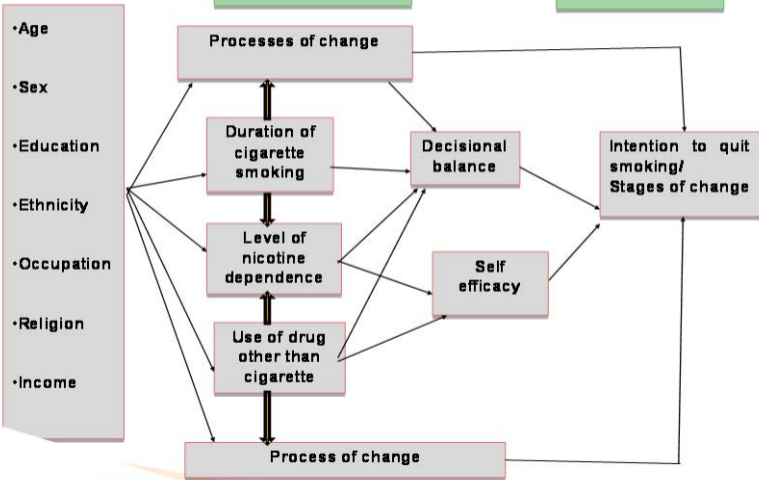

Supplement: MOESM1 [file 9485080]
